# Supplementary material
Source: HighWire-hosted journal article supplement (https://jnm.snmjournals.org/highwire/filestream/94721/field_highwire_adjunct_files/0/148254_Supplemental_Data.pdf)
Supplement: 148254_Supplemental_Data.pdf [file 148254_Supplemental_Data.pdf]

### Mouse 2 Coronal PET-1

Day-1 PET under fed status

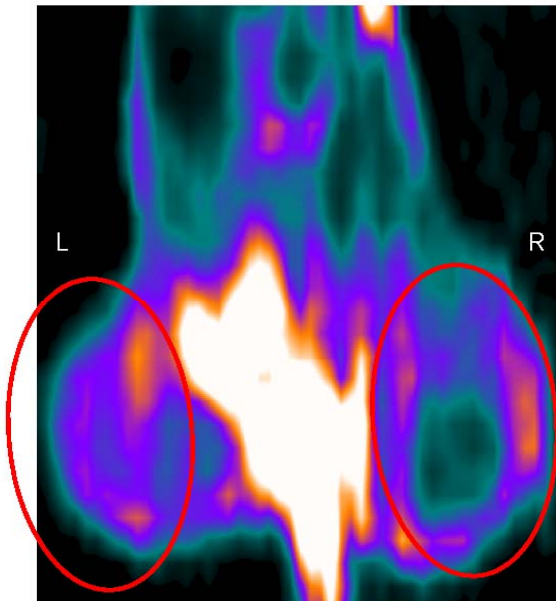

SUVmean = 0.37  
SUVmax = 0.75  
Blood glucose = 71mg/dL

Day -2 PET under fasted status

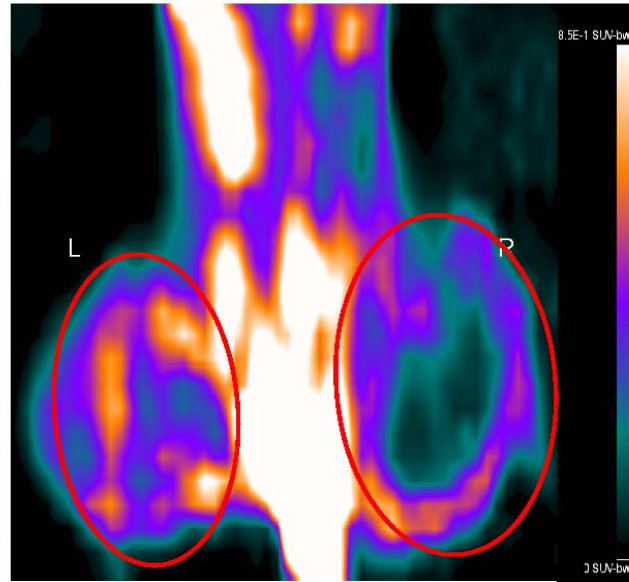

SUVmean = 0.33  
SUVmax = 0.80  
Blood glucose = 29mg/dL

### Mouse 4 Coronal PET

Day-1 PET under fed status

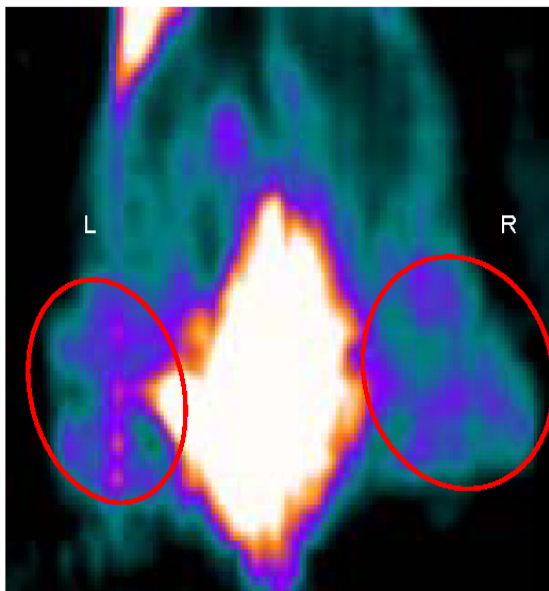

SUVmean = 0.46      SUVmean = 0.41  
SUVmax = 0.80      SUVmax = 0.71  
Blood glucose = 118mg/dL

Day -2 PET under fasted status

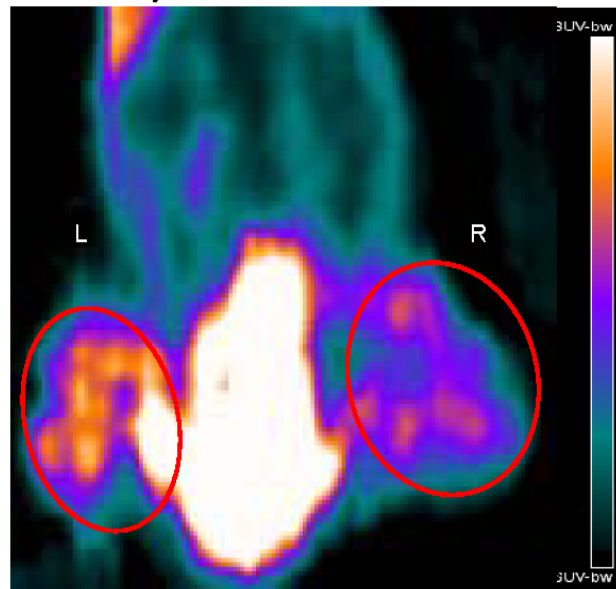

SUVmean = 0.66      SUVmean = 0.59  
SUVmax = 1.14      SUVmax = 1.01  
Blood glucose = 85mg/dL

### Mouse 5 Coronal PET

Day-1 PET under fed status

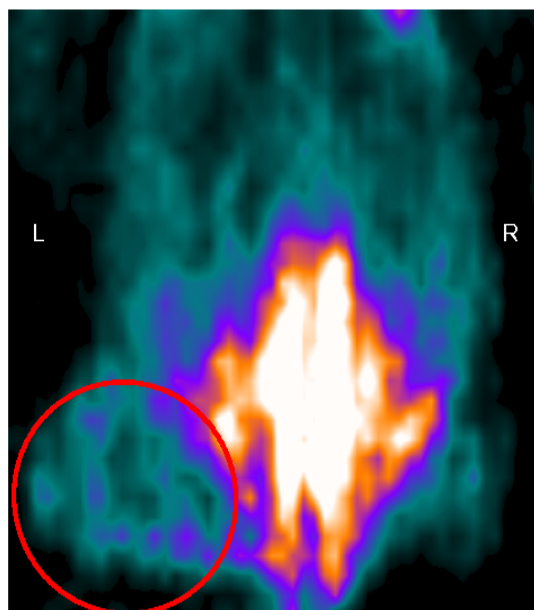

SUVmean=0.38  
SUVmax=0.89

Blood glucose =115mg/dL

Day -2 PET under fasted status

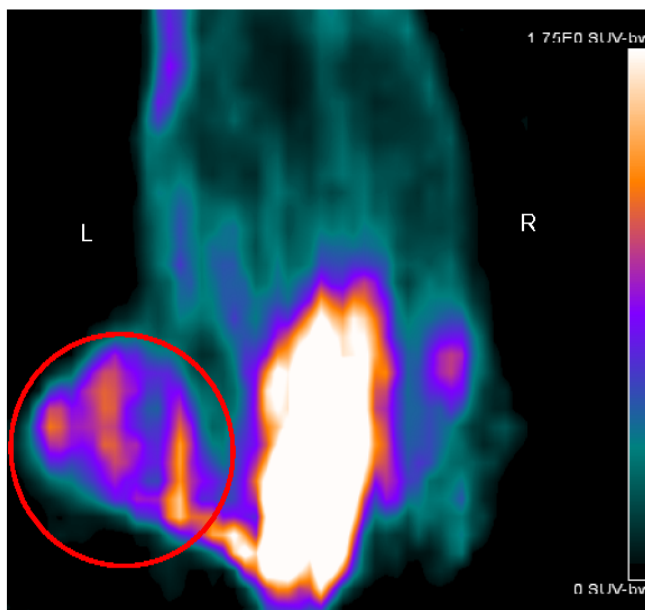

SUVmean=0.83  
SUVmax=1.72

Blood glucose =126mg/dL

### Mouse 5 Transverse PET

Day-1 PET under fed status

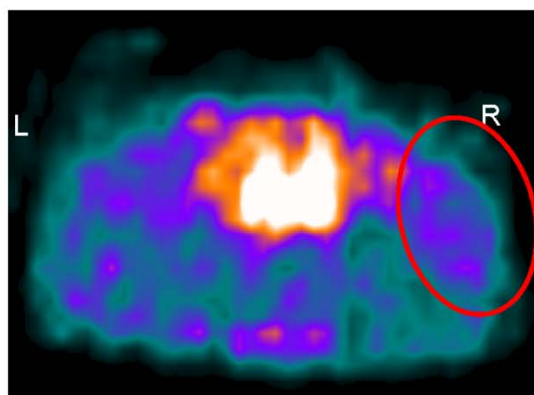

SUVmean=0.73  
SUVmax=1.89

Blood glucose =115mg/dL

Day -2 PET under fasted status

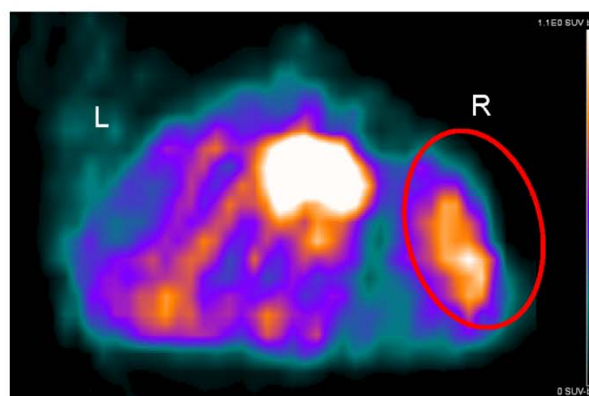

SUVmean=0.62  
SUVmax=1.11

Blood glucose =126mg/dL

## Supplemental Figure 1

A. Coronal  $^{18}\text{F}$ -FDG PET sections of A549 xenograft bearing mouse-2, in fed and fasted status.

Tumors on both flanks are circled. Apparent differences in intratumoral spatial distribution of  $^{18}\text{F}$ -FDG was visualized.

B. Coronal  $^{18}\text{F}$ -FDG PET sections of A549 xenograft bearing mouse-4, in fed and fasted status.

Tumors on both flanks are circled. Apparent differences in intratumoral spatial distribution of  $^{18}\text{F}$ -FDG were visualized.

C. Coronal  $^{18}\text{F}$ -FDG PET sections of A549 xenograft bearing mouse-5, in fed and fasted status.

Tumors on left flanks are circled. Apparent differences in intratumoral spatial distribution of  $^{18}\text{F}$ -FDG were visualized.

D. Transverse  $^{18}\text{F}$ -FDG PET sections of A549 xenograft bearing mouse-5, in fed and fasted

status. Tumors on the right flanks are circled. Apparent differences in intratumoral spatial distribution of  $^{18}\text{F}$ -FDG were visualized.

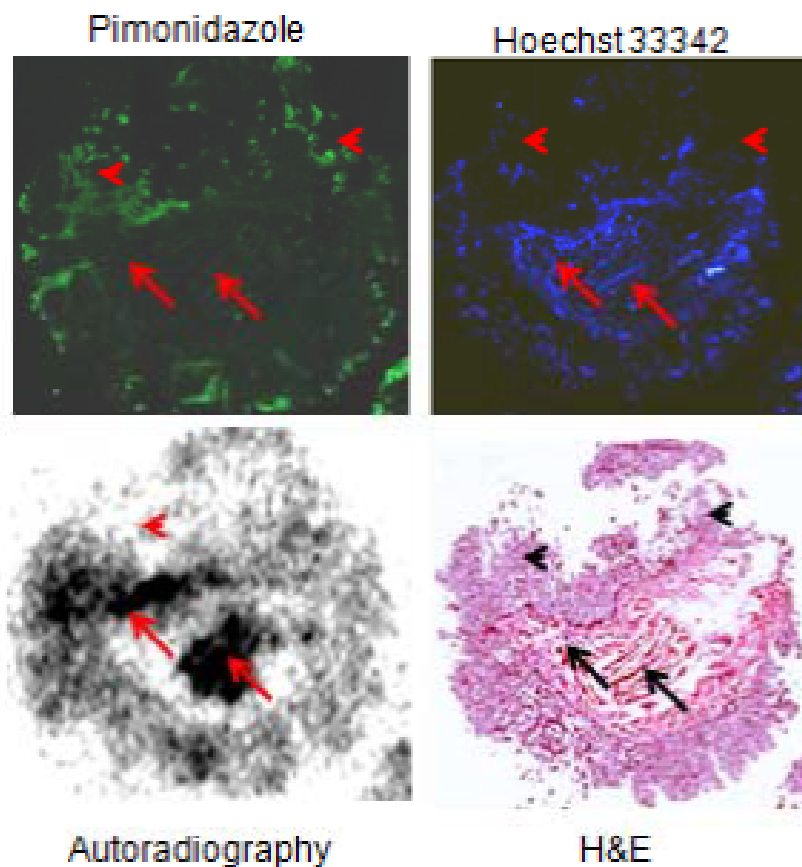

### Supplemental Figure 2

Comparison of the intratumoral distribution of  $^{18}\text{F}$ -FDG by autoradiography with immunohistochemical/histological staining visualization of microenvironment components in an individual fed animal bearing A549 tumor,  $^{18}\text{F}$ -FDG accumulated predominantly in noncancerous stroma within the tumor (arrow) and Hoechst 33342 staining indicated good blood perfusion. There was little  $^{18}\text{F}$ -FDG uptake in viable cancer cells regardless of whether they stained positively or negatively for the hypoxic marker pimonidazole (arrowhead).
